# Supplementary material
Source: publisher figshare collection journal article supplement (https://gsapubs.figshare.com/articles/dataset/_/16834369)

Guibin Zhang, Jiaying Wang, A. Alexander G. Webb, Lifei Zhang, Shuaiqi Liu, Bin Fu, Chenguang Wu, and Shuzhen Wang, 2021, The protoliths of central Himalayan eclogites: GSA Bulletin, <https://doi.org/10.1130/B36080.1>.

## Supplemental Material

**Figure S1.** Plots of selected trace elements versus Zr for eclogites from Thongmön (Dingri County) and Riwu (Dinggye County), China. Literature data for the Riwu eclogites (empty box) were taken from Wang et al. (2017a).

**Figure S2.** Plots of Th/Yb versus Nb/Yb (a) and Nb/Th versus Nb/La for eclogites from Thongmön (Dingri County) and Riwu (Dinggye County), China. Primitive mantle (PM), E-MORB, N-MORB and OIB data are taken from Sun and McDonough (1989), UCC and LCC data are from Rudnick and Gao (2003).

**Table S1.** Major and trace elements of eclogites from Thongmön (Dingri County) and Riwu (Dinggye County), China.

**Table S2.** Sr-Nd isotope data of eclogites from Thongmön (Dingri County) and Riwu (Dinggye County), China.

**Table S3.** Zircon LA-MC-ICPMS U-Pb age of eclogites from Thongmön (Dingri County), China.

**Table S4.** Zircon SHRIMP U-Pb age of eclogites from Riwu (Dinggye County), China.

**Table S5.** Zircon trace elements of eclogites from Thongmön (Dingri County) and Riwu (Dinggye County), China.

**Table S6.** Zircon Hf isotopes of eclogites from Thongmön (Dingri County) and Riwu (Dinggye County), China.

**Table S7.** Zircon oxygen isotope of eclogites from Riwu (Dinggye County), China.

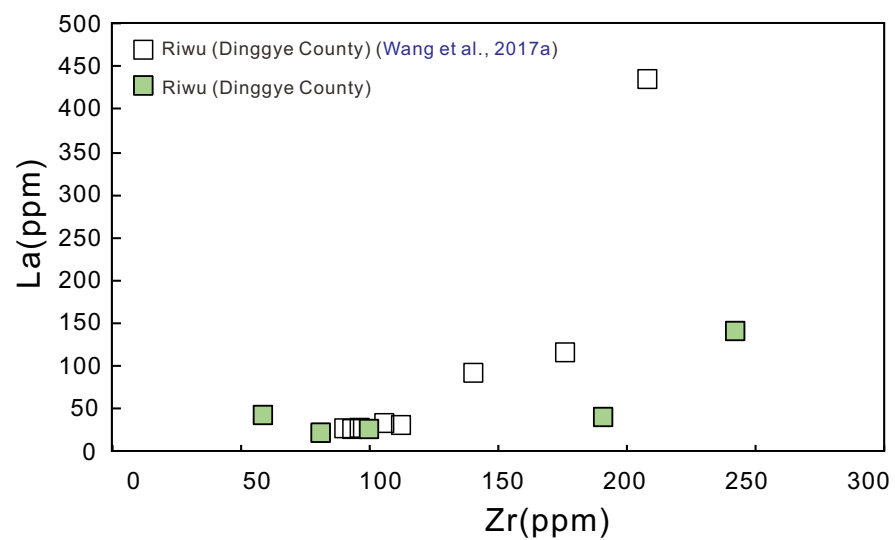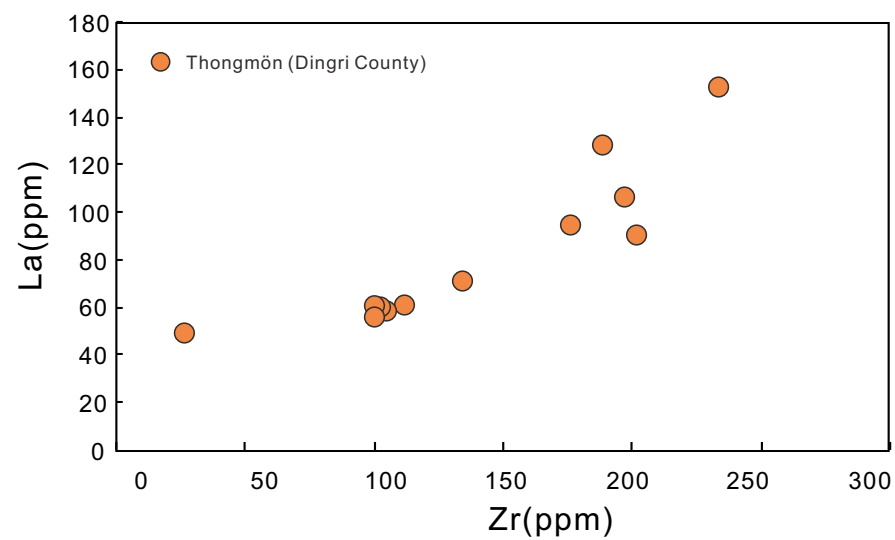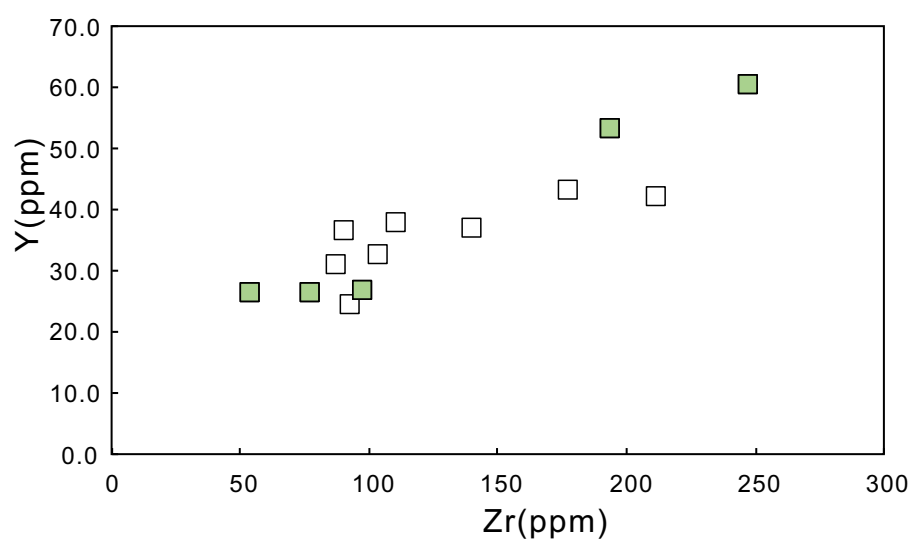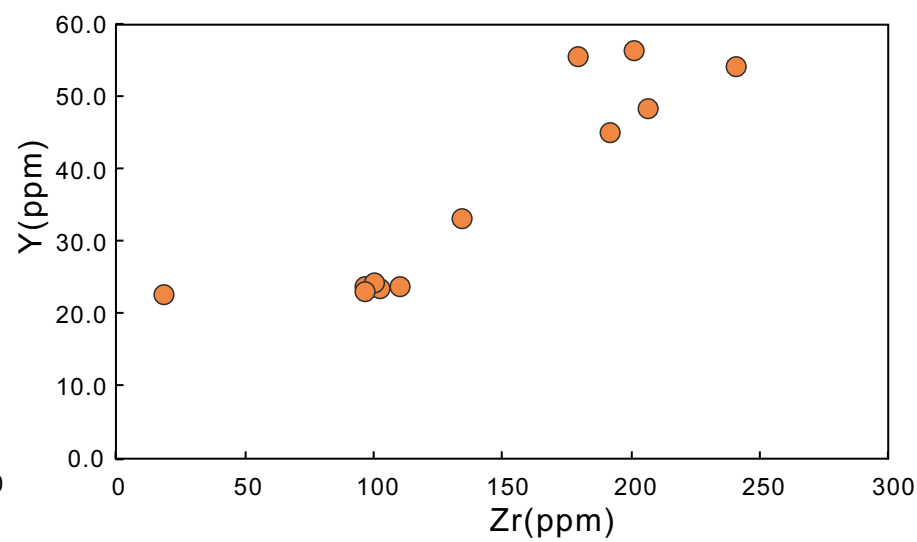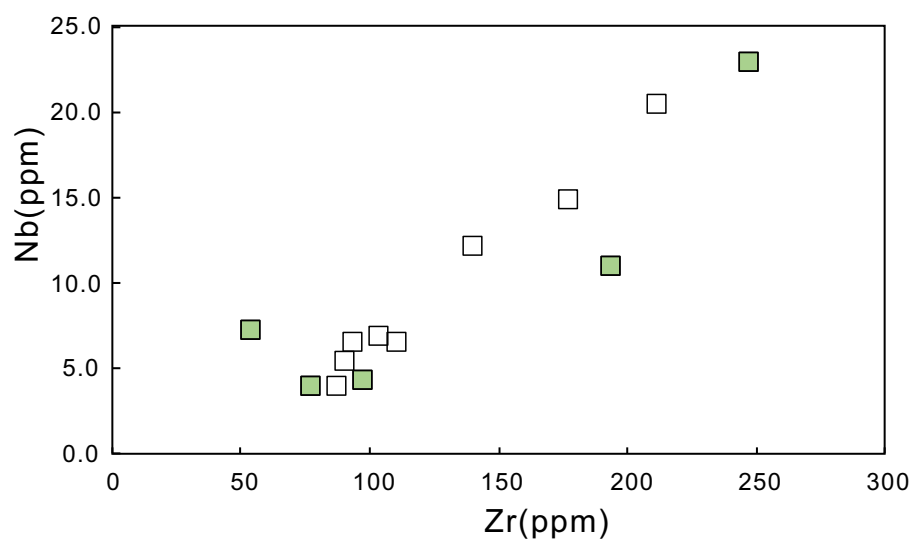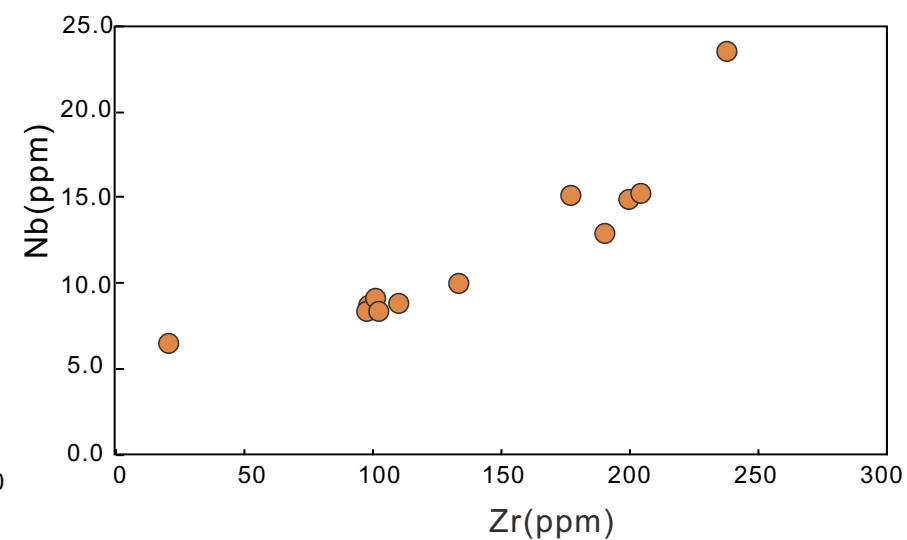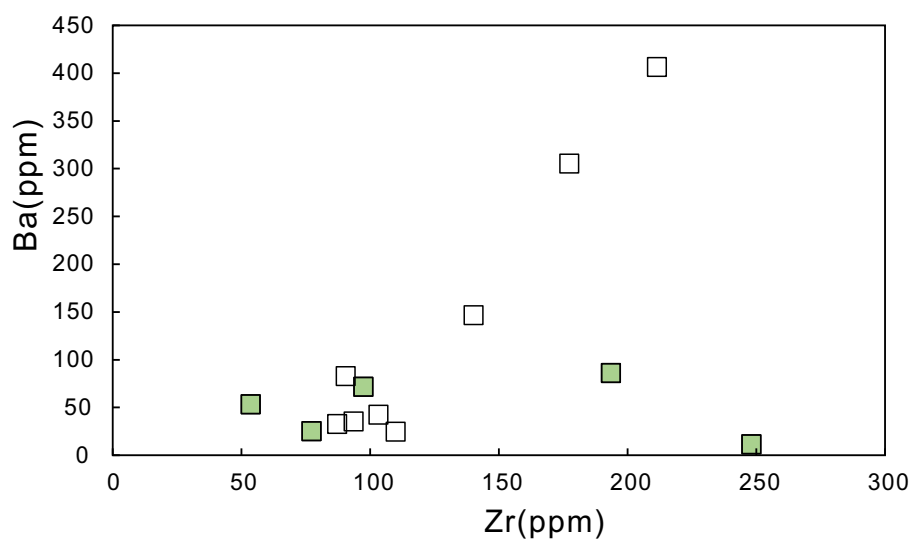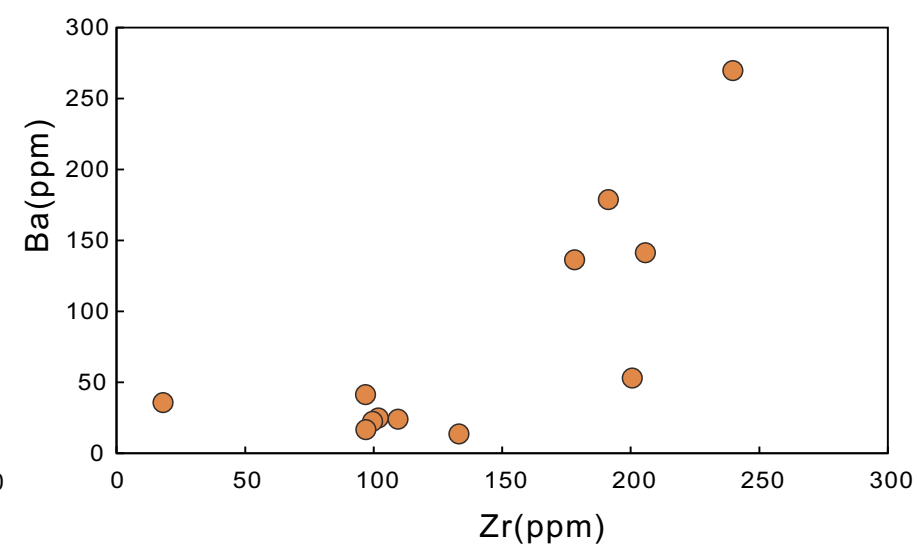

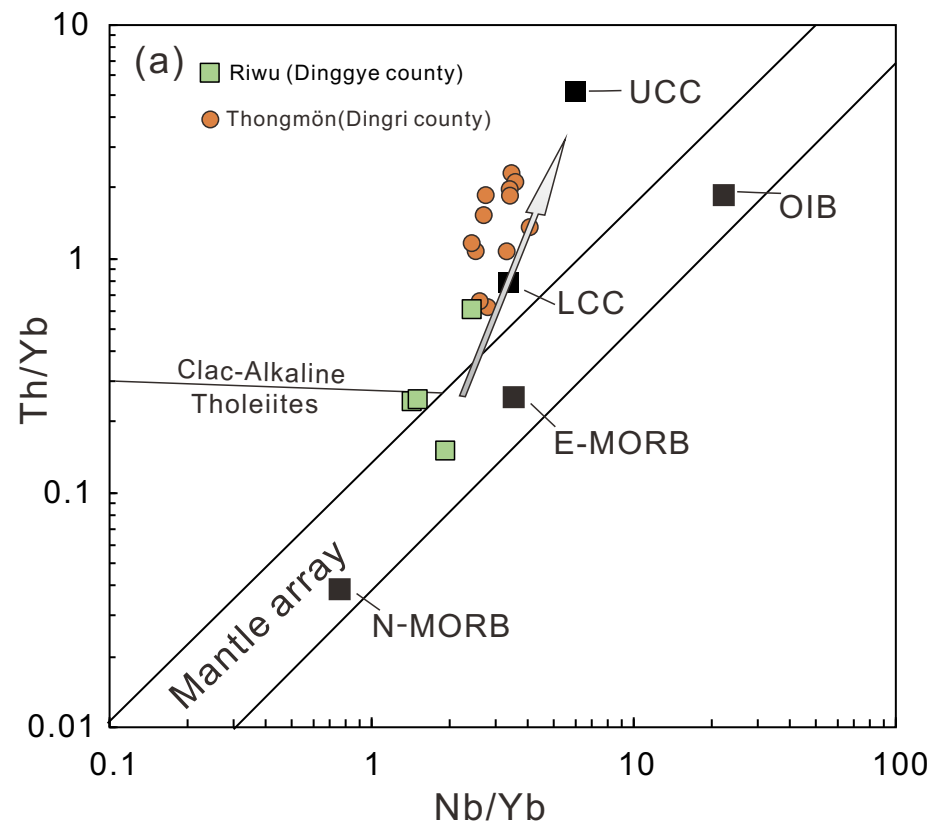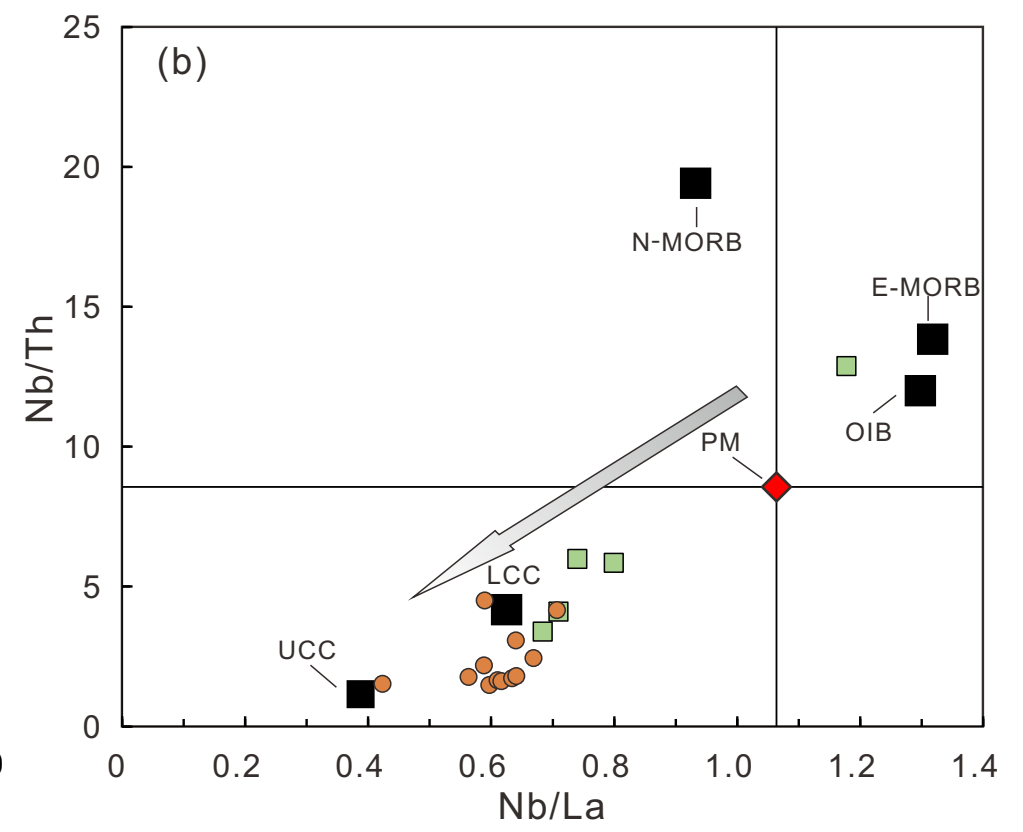

Supplement: Supplementary file 1 [file 2]
